# Supplementary material
Source: ML conference proceedings conference paper supplement (https://proceedings.neurips.cc/paper_files/paper/2022/hash/bb0f9af6a4881ccb6e14c11b8b4be710-Abstract.html)
Supplement: Supplementary file 1 [file bb0f9af6a4881ccb6e14c11b8b4be710-Supplemental-Conference.pdf]

## A Proof of Theorem 1

**Theorem 1.** (1) If the bucket size  $\alpha = 1$  and consecutive repetitions are not merged, then  $\mathbf{d}^{S,T}$  is the most probable sentence of  $T$  characters given by the  $S$  prediction slots. (2) If  $\alpha \neq 1$  or repeating tokens are merged, our algorithm may not be exact.

*Proof.* [Part (1)] Our NACC is trained by the Connectionist Temporal Classification (CTC) algorithm [11], which merges repeated consecutive tokens and removes  $\epsilon$ s in the output sequence. Since the merging operation establishes dependencies between tokens in the output sequence, our length-control algorithm is inexact.

In this part, we consider a variant of the CTC algorithm that does not merge repeated tokens but only removes  $\epsilon$ s; we denote this modified reduction operation by  $\Gamma'$ . For example,  $\Gamma'(aa\epsilon abbe) = aaabb$ . Our thus revised algorithm works as follows.

We denote  $\tilde{\mathbf{d}}^{s,l} = \tilde{d}_1^{s,l} \dots \tilde{d}_s^{s,l}$  as the recursion variable, being the most probable  $s$ -token sequence that is reduced to a summary of length  $l$ .

The initialization of  $\tilde{\mathbf{d}}^{s,l}$  is the same as the original length-control algorithm (§3.2), since the merging operation is not involved here. However, the recursion involves only two cases:

- Case 1:  $w_s = \epsilon$ . The recursion of this case is also the same (see Eqn. 4):

$$\tilde{\mathcal{D}}_1^{s,l} = \{\tilde{\mathbf{d}}^{s-1,l} \oplus \epsilon\} \quad (8)$$

- Case 2:  $w_s \neq \epsilon$ . We have a set of candidate sequences:

$$\tilde{\mathcal{D}}_2^{s,l} = \left\{ \tilde{\mathbf{d}}^{s-1,l'} \oplus w_s : \left( u(w_s) + \sum_{\mathbf{d} \in \tilde{\mathbf{d}}^{s-1,l'}} u(\mathbf{d}) \right) = l, w_s \neq \epsilon, \text{ and } l' < l \right\} \quad (9)$$

This is analogous to Eqn. (6), where  $\alpha = 1$  (due to our theorem assumption). Also, the condition  $w_s \neq \tilde{d}_{s-1}^{s-1,l'}$  in Eqn. (6) is dropped here because this algorithm variant does not merge repeated tokens.

Then, the algorithm chooses the most probable candidate sequence as  $\tilde{\mathbf{d}}^{s,l}$ , given by

$$\tilde{\mathbf{d}}^{s,l} = \underset{\mathbf{d} \in \tilde{\mathcal{D}}_1^{s,l} \cup \tilde{\mathcal{D}}_2^{s,l}}{\operatorname{argmax}} \sum_{s=1}^S v_s(\mathbf{d}_s) \quad (10)$$

Now we will prove that the algorithm is exact: suppose  $P_{s,l} := \sum_{i=1}^s v_i(\tilde{d}_i^{s,l})$  is the log probability of  $\tilde{\mathbf{d}}^{s,l}$ , we have

$$P_{s,l} = \max_{\mathbf{d}_1 \dots \mathbf{d}_s : |\Gamma'(\mathbf{d}_1 \dots \mathbf{d}_s)| = l} \sum_{i=1}^s v_i(\mathbf{d}_i) \quad (11)$$

In other words,  $\tilde{\mathbf{d}}^{s,l}$  is the most probable  $s$ -token sequence that is reduced to length  $l$ . This is proved by mathematical induction as follows.

**Base Cases.** For  $l = 0$ , the variable  $\tilde{\mathbf{d}}^{s,0}$  can only be  $s$ -many  $\epsilon$ s. The optimality in Eqn. (11) holds trivially.

For  $s = 1$  but  $l > 0$ , the algorithm chooses  $\tilde{d}_1^{1,l} = \underset{\mathbf{d}_1 : u(\mathbf{d}_1) = l}{\operatorname{argmax}} v_1(\mathbf{d}_1)$ . Therefore,  $P_{1,l} = \max_{\mathbf{d}_1 : |\Gamma'(\mathbf{d}_1)| = l} v_1(\mathbf{d}_1)$ , showing that Eqn. (11) is also satisfied with only one term in the summation.

**Induction Step.** The induction hypothesis assumes  $P_{s-1,l'} = \max_{\mathbf{d}_1 \dots \mathbf{d}_{s-1} : |\Gamma'(\mathbf{d}_1 \dots \mathbf{d}_{s-1})| = l'} \sum_{i=1}^{s-1} v_i(\mathbf{d}_i)$  for every  $l' < l$ . We will show that the algorithm finds the sequence  $\tilde{\mathbf{d}}^{s,l}$  with  $P_{s,l} = \max_{\mathbf{d}_1 \dots \mathbf{d}_s : |\Gamma'(\mathbf{d}_1 \dots \mathbf{d}_s)| = l} \sum_{i=1}^s v_i(\mathbf{d}_i)$ .

| Word       | $P_1(\cdot \mathbf{x})$ | $P_2(\cdot \mathbf{x})$ |
|------------|-------------------------|-------------------------|
| I          | 0.3                     | 0.1                     |
| am         | 0.4                     | 0.6                     |
| a          | 0.2                     | 0.05                    |
| $\epsilon$ | 0.1                     | 0.25                    |

Table 6: A counterexample showing that our algorithm may be inexact if  $\alpha \neq 1$  or repeated tokens are merged. Here, we set the vocabulary to be three words plus a blank token  $\epsilon$ .

According to Eqn. (10), the variable  $\tilde{\mathbf{d}}^{s,l}$  is the most probable sequence in  $\tilde{\mathcal{D}}_1^{s,l} \cup \tilde{\mathcal{D}}_2^{s,l}$ . Thus, we have

$$P_{s,l} = \max_{l', \mathbf{d}_s: l' + u(\mathbf{d}_s) = l} \{P_{s-1,l'} + v_s(\mathbf{d}_s)\} \quad (12)$$

$$= \max_{l'} \left\{ P_{s-1,l'} + \max_{\mathbf{d}_s: l' + u(\mathbf{d}_s) = l} v_s(\mathbf{d}_s) \right\} \quad (13)$$

$$= \max_{l'} \left\{ \max_{\mathbf{d}_1 \cdots \mathbf{d}_{s-1}: |\Gamma'(\mathbf{d}_1 \cdots \mathbf{d}_{s-1})| = l'} \sum_{i=1}^{s-1} v_i(\mathbf{d}_i) + \max_{\mathbf{d}_s: l' + u(\mathbf{d}_s) = l} v_s(\mathbf{d}_s) \right\} \quad (14)$$

$$= \max_{l'} \left\{ \max_{\substack{\mathbf{d}_1 \cdots \mathbf{d}_s: \\ |\Gamma'(\mathbf{d}_1 \cdots \mathbf{d}_{s-1})| = l' \\ |\Gamma'(\mathbf{d}_1 \cdots \mathbf{d}_s)| = l}} \sum_{i=1}^s v_i(\mathbf{d}_i) \right\} \quad (15)$$

$$= \max_{\mathbf{d}_1 \cdots \mathbf{d}_s: |\Gamma'(\mathbf{d}_1 \cdots \mathbf{d}_s)| = l} \sum_{i=1}^s v_i(\mathbf{d}_i) \quad (16)$$

Here, (13) separates the max operation over  $l'$  and  $\mathbf{d}_s$ ; (14) is due to the induction hypothesis; (15) holds because the two max terms in (14) are independent given  $l'$ , and thus the summations can be grouped; and (16) further groups the two max operations with  $l'$  eliminated. The last two lines are originally proved in [14] and also used in [7].

[Part (2)] We now prove our algorithm may be inexact if  $\alpha \neq 1$  or repeated tokens are merged. We show these by counterexamples.<sup>4</sup>

Suppose  $\alpha \neq 1$  and in particular we assume  $\alpha = 2$ . We further assume repeated tokens are not merged. Consider the example shown in Table 6. The length-control algorithm finds  $\tilde{\mathbf{d}}^{1,1} = \{\text{"am"}\}$ , and then  $\tilde{\mathbf{d}}^{2,2} = \{\text{"am I"}\}$  with the probability of  $0.4 \cdot 0.1 = 0.04$ , as the first bucket covers the length range  $[1, 2]$  and second  $[3, 4]$ . Here, we notice that two words are separated by a white space, which also counts as a character). However, the optimum should be  $\{\text{"I am"}\}$ , which has a probability of  $0.3 \cdot 0.6 = 0.18$ .

Now suppose repeated tokens are merged, and we further assume the length bucket  $\alpha = 1$  in this counterexample. Again, this can be shown by Table 6: the algorithm finds  $\mathbf{d}^{1,1} = \{\text{"I"}\}$  and  $\mathbf{d}^{1,2} = \{\text{"am"}\}$ , based on which we have  $\mathbf{d}^{2,3} = \{\text{"I a"}\}$  with probability  $0.3 \cdot 0.05 = 0.015$ . However, the optimum should be  $\{\text{"a I"}\}$  with probability  $0.2 \cdot 0.1 = 0.02$ .

□

The above theoretical analysis helps us understand when our algorithm is exact (or inexact). Empirically, our approach works well as an approximate inference algorithm.

## Checklist

1. For all authors...
  - (a) Do the main claims made in the abstract and introduction accurately reflect the paper's contributions and scope? [\[Yes\]](#)

<sup>4</sup>To make our counterexample intuitive, we work with probabilities, rather than log-probabilities.

- (b) Did you describe the limitations of your work? [\[Yes\]](#) See Section 5.
  - (c) Did you discuss any potential negative societal impacts of your work? [\[N/A\]](#)
  - (d) Have you read the ethics review guidelines and ensured that your paper conforms to them? [\[Yes\]](#)
2. If you are including theoretical results...
- (a) Did you state the full set of assumptions of all theoretical results? [\[Yes\]](#) In Theorem 1.
  - (b) Did you include complete proofs of all theoretical results? [\[Yes\]](#) In Appendix A.
3. If you ran experiments...
- (a) Did you include the code, data, and instructions needed to reproduce the main experimental results (either in the supplemental material or as a URL)? [\[Yes\]](#) Footnote 1.
  - (b) Did you specify all the training details (e.g., data splits, hyperparameters, how they were chosen)? [\[Yes\]](#) See Section 4.1 for the key setups and the codebase (Footnote 1) for full details.
  - (c) Did you report error bars (e.g., with respect to the random seed after running experiments multiple times)? [\[N/A\]](#) In our preliminary experiments, we found the results are pretty robust.
  - (d) Did you include the total amount of compute and the type of resources used (e.g., type of GPUs, internal cluster, or cloud provider)? [\[Yes\]](#) See Section 4.1.
4. If you are using existing assets (e.g., code, data, models) or curating/releasing new assets...
- (a) If your work uses existing assets, did you cite the creators? [\[Yes\]](#) See Section 4.1.
  - (b) Did you mention the license of the assets? [\[N/A\]](#)
  - (c) Did you include any new assets either in the supplemental material or as a URL? [\[No\]](#)
  - (d) Did you discuss whether and how consent was obtained from people whose data you’re using/curating? [\[N/A\]](#)
  - (e) Did you discuss whether the data you are using/curating contains personally identifiable information or offensive content? [\[N/A\]](#)
5. If you used crowdsourcing or conducted research with human subjects...
- (a) Did you include the full text of instructions given to participants and screenshots, if applicable? [\[N/A\]](#)
  - (b) Did you describe any potential participant risks, with links to Institutional Review Board (IRB) approvals, if applicable? [\[N/A\]](#) While we conducted a human evaluation of machine learning systems, it was neither crowdsourced nor involving human subjects. Instead, it was researchers studying machine learning systems’ outputs (i.e., subjects are machine learning).
  - (c) Did you include the estimated hourly wage paid to participants and the total amount spent on participant compensation? [\[N/A\]](#) Our human evaluation of machine learning systems was done by in-lab research assistants; the research activities were part of their job duties paid through regular salary.
